# Supplementary material for: How economically and environmentally viable are multiple dams in the Upper Cauvery basin, India? A hydro-economic analysis using a landscape-based hydrological model
Source: Copernicus journal article supplement (doi:10.5194/hess-2023-204), 2023-09-11
Supplement: Supplementary file 1 [file hess-2023-204-supplement.pdf]

# How economically and environmentally viable are multiple dams in the Upper Cauvery basin, India? A hydro-economic analysis using a landscape-based hydrological model

Anjana Ekka<sup>1,3</sup>, Yong Jiang<sup>2</sup>, Saket Pande<sup>1</sup>, Pieter van der Zaag<sup>1,2</sup>

<sup>1</sup> Department of Water Management, Delft University of Technology, Delft, The Netherlands

<sup>2</sup> IHE Delft Institute for Water Education, Delft, The Netherlands

<sup>3</sup> ICAR-Central Inland Fisheries Research Institute, Barrackpore, India

Correspondence to: Saket Pande (s.pande@tudelft.nl)

## [Supplementary materials](#)

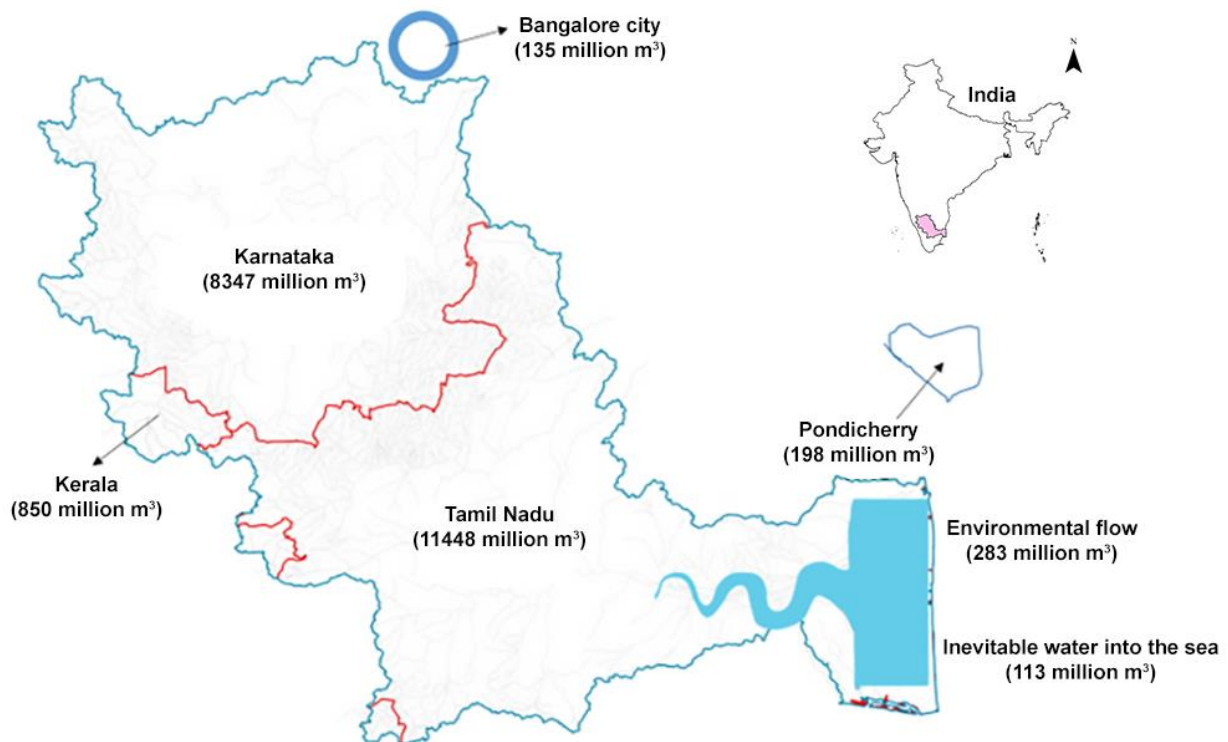

Figure S.1. Water allocation in the Cauvery basin (million m<sup>3</sup>/year) across the several states and union territories in accordance with the Supreme Court's 2018 Judgment.

## Supplementary materials

### 15 **1. The FLEX-Topo model**

16 The FLEX-Topo model simulates dominant hydrological processes in various landscape units known as  
17 hydrological response units (HRUs). Figure S.2 illustrates such HRU specific processes modeled by FLEX-Topo,  
18 which are calibrated based on the parameters shown in Table S.1. Height Above Nearest Drainage (HAND), slope,  
19 elevation (DEM) and land use maps are used to categorize these HRUs.

20

21 Rainfall ( $P$ ) is partitioned into interception evaporation ( $E_i$ ) and effective rainfall ( $P_e$ ) based on a threshold value  
22 ( $S_i \max$ ). The effective rainfall is retained by the soil and excess results in runoff,  $R$ , which is a function of root  
23 zone storage capacity parameter ( $S_u, \max$ ) and a shape parameter ( $\beta$ ). Plant transpiration ( $E$ ) is calculated  
24 considering potential evaporation ( $E_o$ ), a soil moisture threshold parameter ( $C_e$ ), and relative soil moisture ( $S_u/S_u,$   
25  $\max$ ). The generated runoff is then separated into fast ( $R_f$ ) and slow ( $R_s$ ) components using a separator ( $D$ ). A lag  
26 function is applied to represent the lag time ( $T$ ) between peak flow and the storm event. The fast and slow runoff  
27 components are modeled using two linear reservoirs with different time constants ( $K_f$  and  $K_s$ ). The total runoff  
28 ( $Q_m$ ) is the sum of these fast and slow components ( $Q_f$  and  $Q_s$ ).

29

30 The landscape classification affects the parameters of the unsaturated root zone reservoir ( $S_u, \max$ ) due to  
31 variations in rooting depth caused by topography and land use. The  $S_u, \max$  values for hillslope forest and plateau  
32 forest are assumed to be larger than those for hillslope crops and plateau crops. In wetlands, the root zone storage  
33 capacity ( $S_u, \max, W$ ) is relatively low due to the shallow groundwater table.

34

35 Five HRUs are determined based on the percentage of landscape classes for the upstream and downstream areas  
36 of the reservoir for each sub-basin (Figure S.2). These HRUs are connected to a common groundwater reservoir,  
37 recharged by different sources depending on the landscape class (e.g., hillslope forest, hillslope crop, plateau  
38 forest, plateau crop, and capillary rise from wetlands).

39

40 After calibrating the reservoir operations model and integrating it with the FLEX-Topo models for the areas  
41 upstream and downstream of a reservoir within the corresponding sub-basin, the FLEX-Topo parameters (within  
42 the ranges shown in Table S.1) are optimized to ensure the representation of the hydrological processes for various  
43 sub-basins (four sub-basins, one for each of the four reservoirs) in the Upper Cauvery basin, which is

## Supplementary materials

44 predominantly covered by field crops, plantation crops, and evergreen forests. For more details readers are referred  
 45 to Ekka et al. (2022).

46

47 Table S.1. FLEX-Topo model parameters ranges. These define the feasible range within which parameters are  
 48 calibrated and are discussed in detail in Ekka et al. (2022).

| Parameters                                                                 | HRU specific parameter ranges |                   |                                                                                         |                     |          |
|----------------------------------------------------------------------------|-------------------------------|-------------------|-----------------------------------------------------------------------------------------|---------------------|----------|
|                                                                            | Plateau<br>crop               | Plateau<br>forest | Hillslope<br>crop                                                                       | Hillslope<br>forest | Wetlands |
| $I_{\max}$ [mm/day]<br>(Storage capacity of the Interception<br>reservoir) | 1-8                           | 6-10              | 1-8                                                                                     | 6-10                | 1-5      |
| $C_c$ [-]<br>(Fraction of $S_{u, \max}$ )                                  | 0.1-1                         | 0.1-1             | 0.1-1                                                                                   | 0.1-1               | 0.1-1    |
| $S_{u, \max}$ [mm]<br>(Maximum soil moisture capacity in the<br>root zone) | 100-500                       | 100-1000          | 100-500                                                                                 | 100-1000            | 10-100   |
| $\beta$ [-]<br>(Spatial heterogeneity in the<br>catchment/shape parameter) | 0.1-5                         | 0.1-5             | 0.1-5                                                                                   | 0.1-5               | 0.1-5    |
| $P_{\max}$ [-]<br>(Maximum percolation rate)                               | 0.1-5                         | 0.1-5             | -                                                                                       | -                   | -        |
| $D$ [-]<br>(The splitter)                                                  | -                             | -                 | 0-0.5                                                                                   | 0-0.5               | -        |
| $C_{R, \max}$ [mm/day]<br>(Capillary rise)                                 | -                             | -                 | -                                                                                       | -                   | 0.01-1   |
| $K_f$ [d]<br>(Recession coefficient of the fast reservoir)                 | 0.005 -1                      | 0.005 -1          | 0.005-1                                                                                 | 0.005-1             | 0.005-1  |
| Catchment scale parameter ranges                                           |                               |                   |                                                                                         |                     |          |
| $K_s$ [d]<br>(Recession coefficient of the slow<br>reservoir)              |                               |                   | 0.0001-0.01                                                                             |                     |          |
| $T_{\text{lag}}$ [d]<br>(Time lag between the storm and peak<br>flow)      |                               |                   | 0.1 – 30                                                                                |                     |          |
| Frac 1 [-]<br>(Fraction of forests cover)                                  |                               |                   | The value is fixed (0 -1) based on the percentage of<br>forest area in the sub-basin    |                     |          |
| Frac 2 [-]<br>(Fraction of Irrigation)                                     |                               |                   | The value is fixed (0 -1) based on the percentage of<br>Irrigated area in the sub-basin |                     |          |

49

50 Source Ekka et al. (2022)

51

52

53

54

55

56

57

59

60

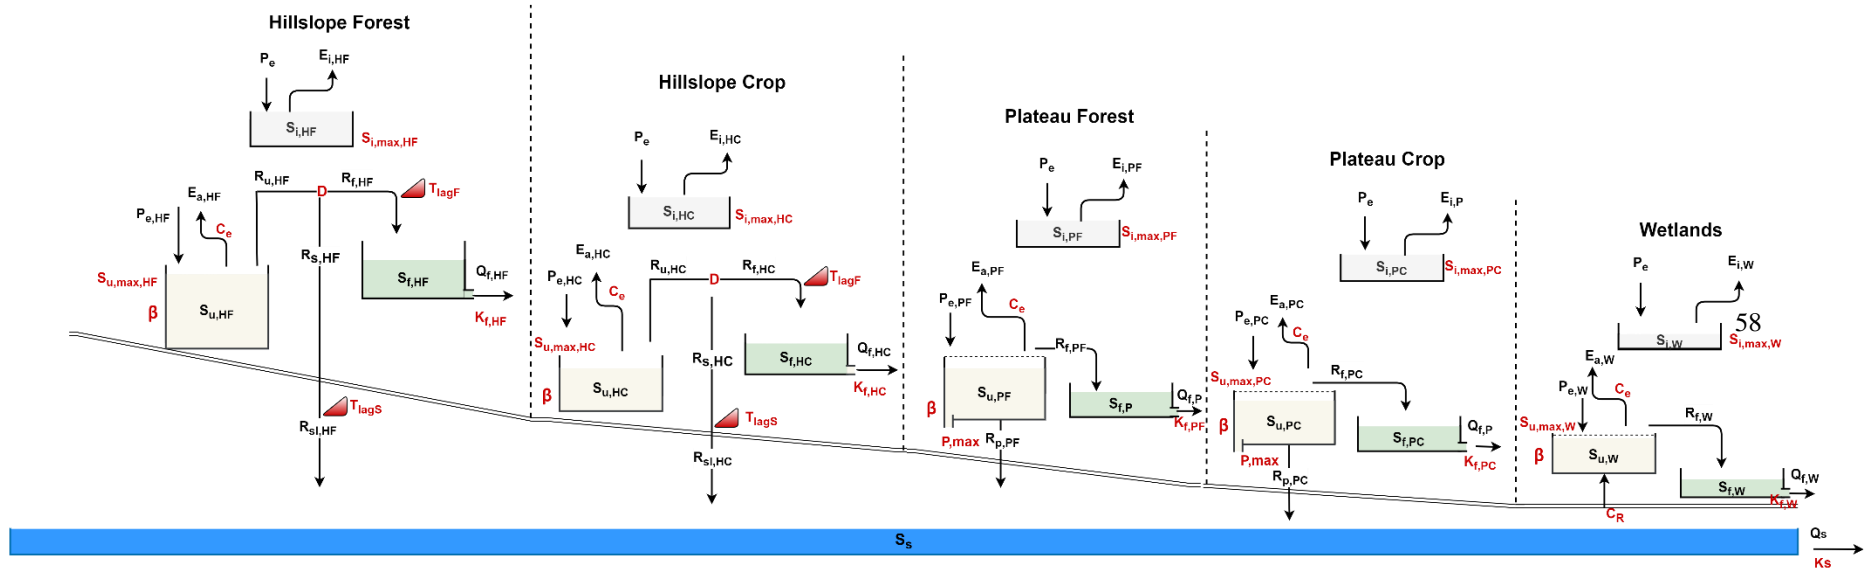

61

62

63

64

Figure S.2 The dominant processes of different HRUs of the FLEX-Topo model used in this study. Various landscape class specific parameters are shown in red and variables in black. Flows from various reservoirs,  $Q$  with corresponding subscripts, are added to obtain total flow and the regime. Source: Ekka et al. (2022).

## 2. Calibration and validation of the integrated model

The model parameters are calibrated using the Elitist Non-Dominated Sorting Genetic (NSGA-II) algorithm (Deb et al., 2000). NSGA-II is a multi-objective optimization algorithm, which can optimize multiple objectives and provides a collection of parameter values (Pareto optimal) that are not dominated by any other feasible parameters in terms of performance in the multi-objective space.

Table S.2 provides the parameter setting of the NSGA-II algorithm. Population crossing over and population mutation play crucial roles in optimization. For better convergence and to prevent the population from becoming trapped in local optima, a higher fraction of population crossing over and a lower value of mutation value are preferred (Wang et al., 2019). The population size depends on the number of decision variables calibrated in the model, and it is recommended for the simulation to maintain a population size that is five times the number of decision variables (Gutierrez et al., 2019). The reservoir operations model has five parameters and therefore NSGA-II has a population size of 25 when calibrating its parameters. Since there are 20 parameters that are calibrated for FLEX-Topo, the population size is maintained at 100 when calibrating its parameters after the calibrated reservoir operations model has been integrated. Higher population sizes were also tested but not used due to similar performance. 250 iterations were ultimately selected based on the best optimization from amongst 50, 100, 250, and 500 iterations.

| NSGA II parameters        | Reservoir calibration | Integrated FLEX-Topo Calibration |
|---------------------------|-----------------------|----------------------------------|
| No. of Iterations         | 250                   | 300                              |
| No. of decision variables | 5-8                   | 25                               |
| No. of population size    | 25-40                 | 125                              |
| Population Crossover      | 0.7                   | 0.7                              |
| Mutation probabilities    | 0.2                   | 0.2                              |
| New generation selection  | Elitist selection     | Elitist selection                |
| Ordering criteria         | Crowding distance     | Crowding distance                |

Table S.2. Parameter setting for NSGA II optimization of the model.

Source: Ekka et al., 2022

Table S.3 presents the calibration results of both reservoir operations models and FLEX-Topo parameters after integrating the reservoir operations models for each of the sub-basins, obtained using the NSGA II algorithm. Negative Nash-Sutcliffe Efficiency (NSE) values are reported instead of positive NSE (due to its use to maximize as an objective in NSGA-II), and the Pareto front ranges for both -NSE (note the negative sign in front of NSE) and Mean Absolute Error (MAE) are shown within the parentheses. The MAE values range from 0.71 to 2.92 ( $10^6 \text{ m}^3 \text{ day}^{-1}$ ), falling within an acceptable range. Lower MAE values indicate better predictions. Similarly, the NSE values, which assess the model's goodness of fit, range from 0.51 to 0.73, all above the acceptable threshold of 0.50.

Note that the calibration and validation of the reservoir operations models did not include validation against observed streamflow at the reservoir outlets. Despite this limitation, the overall MAE and NSE values indicate

## Supplementary materials

acceptable performance for the reservoir operations models, given the available data and operational considerations.

Table S.3. The model performance metrics for the calibration of the four reservoirs and the calibration and validation of the Flex-Topo models (i.e., the integration of calibrated reservoirs with upstream and downstream FLEX-Topo models) for the corresponding four sub-basins.

| <b>Reservoir Calibration (2011-2016)</b>          |                                |                                                                        |                               |                                      |
|---------------------------------------------------|--------------------------------|------------------------------------------------------------------------|-------------------------------|--------------------------------------|
| <b>Reservoirs</b>                                 | <b>-NSE [range]</b>            | <b>MAE [range]<br/>(10<sup>6</sup> m<sup>3</sup> day<sup>-1</sup>)</b> |                               |                                      |
| Harangi(kudige)                                   | -0.64 [-0.65 - (-0.63)]        | 2.92 [ 2.92 -3.01]                                                     |                               |                                      |
| Hemavathi (M.H. Halli)                            | -0.51 [-0.52 - (-0.51)]        | 1.15 [1.15 -1.16]                                                      |                               |                                      |
| Kabini (T. Narasipur)                             | -0.73 [-0.73 - (-0.72)]        | 1.24 [ 1.24-1.24]                                                      |                               |                                      |
| KRS(Kollegal)                                     | -0.68 [-0.67 - (-0.69)]        | 0.71 [0.70 - 0.72]                                                     |                               |                                      |
| <b>Flex-Topo model calibration and validation</b> |                                |                                                                        |                               |                                      |
| <b>Sub-basins</b>                                 | <b>Calibration (1991-2010)</b> |                                                                        | <b>Validation (2011-2016)</b> |                                      |
|                                                   | <b>-NSE [range]</b>            | <b>MAE [range]<br/>(mm day<sup>-1</sup>)</b>                           | <b>-NSE</b>                   | <b>MAE<br/>(mm day<sup>-1</sup>)</b> |
| Kudige                                            | -0.80 [-0.81 - (-0.80)]        | 1.36 [1.33 -1.39]                                                      | -0.65                         | 2.05                                 |
| M.H. Halli                                        | -0.57 [-0.57 - (-0.56)]        | 0.37 [0.40 -0.41]                                                      | -0.52                         | 0.48                                 |
| T.Narasipur                                       | -0.53 [-0.53 - (-0.50)]        | 0.67 [0.67- 0.69]                                                      | -0.52                         | 0.66                                 |
| Kollegal                                          | -0.53 [-0.54 - (-0.52)]        | 0.92 [0.92 -0.97]                                                      | -0.50                         | 0.86                                 |

Note: The reported value in front of the parenthesis represents the parameter value on the Pareto front this is closed to the origin using Euclidean distance. The range in the parenthesis represent the range of possible solutions lying on the Pareto front. Source: Ekka et al. (2022).

The calibrated reservoir model is integrated with the FLEX-Topo model, the FLEX-Topo model parameters are calibrated and Table S.3 reports the performance of the resulting integrated model. The NSE values for all sub-basins ranged from 0.53 to 0.80 during the calibration phase and from 0.50 to 0.65 during the validation phase. NSE scores over 0.50 are regarded as acceptable and denote the integrated model's performance at acceptable levels for all the four sub-basins. Further, the Mean Absolute Error (MAE) for calibration and validation are within acceptable ranges of 0.86 to 2.05 mm day<sup>-1</sup> and 0.92 to 1.36 mm day<sup>-1</sup>, for calibration and validation phases respectively.

Table S.4. Definitions of major Indicators of Hydrological Alteration (IHA)

| <b>Flow characteristics</b> | <b>Indicators of Hydrologic Alteration (IHA)</b> | <b>Definitions (for non-parametric)</b>                                                                         |
|-----------------------------|--------------------------------------------------|-----------------------------------------------------------------------------------------------------------------|
| Magnitude/ timing           | The median value for each calendar month         | Median (m <sup>3</sup> s <sup>-1</sup> ) of daily flow condition from January to December                       |
|                             | Annual minima, 1-day median                      | Minimum flow value (m <sup>3</sup> s <sup>-1</sup> ) occurred in a year                                         |
|                             | Annual minima, 3-day median                      | Minimum flow value (m <sup>3</sup> s <sup>-1</sup> ) for the mean daily flow of 3 consecutive days of the year  |
|                             | Annual minima, 7-day median                      | Minimum flow value (m <sup>3</sup> s <sup>-1</sup> ) for the mean daily flow of 7 consecutive days of the year  |
|                             | Annual minima, 30-day median                     | Minimum flow value (m <sup>3</sup> s <sup>-1</sup> ) for the mean daily flow of 30 consecutive days of the year |
|                             | Annual minima, 90-day median                     | Minimum flow value (m <sup>3</sup> s <sup>-1</sup> ) for the mean daily flow of 90 consecutive days of the year |
|                             | Annual maxima, 1-day median                      | Maximum flow value (m <sup>3</sup> s <sup>-1</sup> ) occurred in a year                                         |

Supplementary materials

|                               |                              |                                                                                                        |
|-------------------------------|------------------------------|--------------------------------------------------------------------------------------------------------|
| Magnitude/ duration           | Annual maxima, 3-day median  | Maximum flow value ( $m^3s^{-1}$ ) for the mean daily flow of 3 consecutive days of the year           |
|                               | Annual maxima, 7-day median  | Maximum flow value ( $m^3s^{-1}$ ) for the mean daily flow of 7 consecutive days of the year           |
|                               | Annual maxima, 30-day median | Maximum flow value ( $m^3s^{-1}$ ) for the mean daily flow of 30 consecutive days of the year          |
|                               | Annual maxima, 90-day median | Maximum flow value ( $m^3s^{-1}$ ) for the mean daily flow of 90 consecutive days of the year          |
| Duration                      | Low pulse count (days)       | No of times in a year when the flow is lower than the 25 % percentile of the flow period               |
|                               | High pulse count (days)      | No. of times in a year when the flow is higher than the 75 % percentile of the flow period in analysis |
|                               | Low pulse duration (days):   | The median duration of the low pulses (days)                                                           |
|                               | High pulse duration (days):  | The median duration of the high pulses (days)                                                          |
| Environmental flow components | Extreme low peak             | Minimum flow event during each water year or season                                                    |
|                               | Extreme low frequency        | Frequency of extreme low flows during each water year or season                                        |

References: compiled from The Nature Conservancy (TMC), 2009

Table S.5. The residence time of the reservoirs

| Reservoir                 | Year of construction | Sub-basin based on gauge location | Catchment area ( $10^6 m^2$ ) | Gross Storage ( $10^6 m^3$ ) | Residence time (months) |
|---------------------------|----------------------|-----------------------------------|-------------------------------|------------------------------|-------------------------|
| Harangi                   | 1982                 | Kudige                            | 419.58                        | 240.69                       | 7.23                    |
| Hemavathi                 | 1979                 | M.H. Halli                        | 2810                          | 1050.63                      | 22.63                   |
| Krishna Raja Sagara (KRS) | 1938                 | Kollegal                          | 10619                         | 1400.31                      | 8.68                    |
| Kabini                    | 1974                 | T. Narasipur                      | 2141.90                       | 552.74                       | 3.57                    |

Table S.6. The crop coefficients (Kc) and yield response factors (Ky) used to calculate crop specific yields

| Crops                 | Kc   | Ky   | Tur (Red gram)                    | 0.74      | 0.90      |
|-----------------------|------|------|-----------------------------------|-----------|-----------|
| <b>1 CEREAL CROPS</b> |      |      | <b>3 OIL SEEDS CROPS</b>          |           |           |
| Bajra                 | 0.67 | 0.92 | Linseed                           | 0.78      | 0.70      |
| Jowar                 | 0.69 | 0.92 | Castor                            | 0.7       | 0.70      |
| Maize                 | 1.06 | 1.25 | Groundnut                         | 0.78      | 0.70      |
| Paddy                 | 1.14 | 1.20 | Niger seed                        | 0.7       | 0.80      |
| Ragi                  | 0.69 | 0.90 | Rape & Mustard                    | 0.75      | 0.80      |
| <b>2 PULSES CROPS</b> |      |      | Safflower                         | 0.75      | 0.80      |
| Avare                 | 0.74 | 0.85 | Sesamum                           | 0.75      | 0.95      |
| Bengal gram (Gram)    | 0.90 | 0.90 | Soyabean                          | 0.70      | 0.85      |
| Black gram            | 0.65 | 0.85 | Sunflower                         | 0.75      | 0.95      |
| Cowpea                | 1.19 | 0.98 | <b>4 COMMERCIAL / FIBRE CROPS</b> |           |           |
| Green gram            | 0.89 | 0.80 | Cotton                            | 0.88      | 0.85      |
| Horse gram            | 0.74 | 0.90 | Sugarcane                         | 1.58      | 1.20      |
| Navane                | 0.74 | 0.70 | Tobacco                           | 0.9       | 1.10      |
|                       |      |      | <b>Crops</b>                      | <b>Kc</b> | <b>Ky</b> |

## Supplementary materials

---

| <b>5 PLANTATION &amp; HORTICULTURAL CROPS</b> |      |      |
|-----------------------------------------------|------|------|
| Lemon                                         | 0.7  | 1.10 |
| Onion                                         | 1.19 | 1.10 |
| Tomato                                        | 1.19 | 1.05 |
| Banana                                        | 1.12 | 1.20 |
| Beans                                         | 0.93 | 1.15 |
| Brinjal                                       | 0.93 | 0.85 |
| Cabbage                                       | 1.19 | 0.85 |
| Cashewnut<br>(Raw&Processed<br>Nuts)          | 0.8  | 0.90 |
| Coconut                                       | 0.8  | 0.90 |
| Grapes                                        | 0.85 | 1.10 |
| Guava                                         | 0.69 | 1.10 |
| Mango                                         | 0.69 | 1.10 |
| Papaya                                        | 0.93 | 0.90 |
| Pomogranate                                   | 0.5  | 0.90 |
| Potato                                        | 1.09 | 1.10 |
| Sapota                                        | 0.7  | 0.90 |
| Sweetpotato                                   | 1.09 | 1.00 |
| Tapioca                                       | 1.09 | 0.80 |
| Coffee (Arabica)                              |      |      |
| Coffee (Robusta)                              |      |      |

---

| <b>6 CONDIMENTS &amp; SPICES CROPS</b> |      |      |
|----------------------------------------|------|------|
| Coriandar                              | 1.19 | 1.20 |
| Arecanut (Raw &<br>Processed Nuts)     | 0.8  | 0.90 |
| Black pepper                           | 1.19 | 1.10 |
| Cardamom                               | 1.19 | 1.10 |
| Dry Chillies                           | 0.95 | 1.10 |
| Dry Ginger                             | 0.93 | 1.10 |
| Garlic                                 | 1.19 | 0.90 |
| Turmeric                               | 1.01 | 0.85 |

---

Source: Compiled from Allen et al., 1998; Mohan & Arumugam.,1994



Supplementary materials

Table S.7. An overview of the irrigated and non-irrigated areas of the districts (columns) lying within the sub-basins of the respective reservoirs (rows)

| Reservoirs | Kodagu (ha)               |                           |             | Mysore (ha)               |                           |             | Hassan (ha)               |                               |             | Chikmagalur (ha)          |                           |             |
|------------|---------------------------|---------------------------|-------------|---------------------------|---------------------------|-------------|---------------------------|-------------------------------|-------------|---------------------------|---------------------------|-------------|
|            | Irrigated (with in basin) | Irrigated (Outside basin) | Unirrigated | Irrigated (with in basin) | Irrigated (Outside basin) | Unirrigated | Irrigated (with in basin) | Irrigated (Outside the basin) | Unirrigated | Irrigated (with in basin) | Irrigated (Outside basin) | Unirrigated |
| Harangi    | 2792.00                   | 0.00                      | 79808.30    | 14481.78                  | 27329.22                  | 0.00        | 0.00                      | 8935.00                       | 0.00        | 0.00                      | 0.00                      | 0.00        |
| Hemavathi  | 1060.00                   | 0.00                      | 17661.12    | 0.00                      | 2267.00                   | 0.00        | 69223.00                  | 0.00                          | 82027.64    | 0.00                      | 0.00                      | 75937.08    |
| Kabini     | 0.00                      | 0.00                      | 15461.33    | 23028.00                  | 0.00                      | 133798.82   | 0.00                      | 0.00                          | 0.00        | 0.00                      | 0.00                      | 0.00        |
| KRS        | 0.00                      | 0.00                      | 55919.38    | 34673.00                  | 0.00                      | 124432.11   | 0.00                      | 0.00                          | 268040.72   | 0.00                      | 0.00                      | 0.00        |

| Reservoirs | Chamrajanagar (ha)            |                               |             | Mandya (ha)               |                               |             | Tumkur (ha)               |                           |             | Wayanad (ha)                  |                               |             |
|------------|-------------------------------|-------------------------------|-------------|---------------------------|-------------------------------|-------------|---------------------------|---------------------------|-------------|-------------------------------|-------------------------------|-------------|
|            | Irrigated (with in sub-basin) | Irrigated (Outside sub-basin) | Unirrigated | Irrigated (with in basin) | Irrigated (Outside the basin) | Unirrigated | Irrigated (with in basin) | Irrigated (Outside basin) | Unirrigated | Irrigated (with in sub-basin) | Irrigated (Outside sub-basin) | Unirrigated |
| Harangi    | 0.00                          | 0.00                          | 0.00        | 0.00                      | 0.00                          | 0.00        | 0.00                      | 0.00                      | 0.00        | 0.00                          | 0.00                          | 0.00        |
| Hemavathi  | 0.00                          | 0.00                          | 0.00        | 0.00                      | 92239.00                      | 0.00        | 0.00                      | 127076.00                 | 0.00        | 0.00                          | 0.00                          | 0.00        |
| Kabini     | 22702.00                      | 0.00                          | 103389.02   | 0.00                      | 0.00                          | 225.47      | 0.00                      | 0.00                      | 0.00        | 0.00                          | 0.00                          | 98640.87    |
| KRS        | 73409.00                      | 0.00                          | 72242.64    | 0.00                      | 0.00                          | 207379.38   | 0.00                      | 0.00                      | 0.00        | 0.00                          | 0.00                          | 0.00        |

| Reservoirs | Erode (ha)                |                               |             | The Nilgiris (ha)         |                               |             |
|------------|---------------------------|-------------------------------|-------------|---------------------------|-------------------------------|-------------|
|            | Irrigated (with in basin) | Irrigated (Outside the basin) | Unirrigated | Irrigated (with in basin) | Irrigated (Outside the basin) | Unirrigated |
| Harangi    | 0.00                      | 0.00                          | 0.00        | 0.00                      | 0.00                          | 0.00        |
| Hemavathi  | 0.00                      | 0.00                          | 0.00        | 0.00                      | 0.00                          | 0.00        |
| Kabini     | 0.00                      | 0.00                          | 0.00        | 0.00                      | 0.00                          | 22711.92    |
| KRS        | 0.00                      | 0.00                          | 54349.34    | 0.00                      | 0.00                          | 0.00        |



Supplementary materials

|                                  |                                             |          |          |          |         |          |          |        |         |          |
|----------------------------------|---------------------------------------------|----------|----------|----------|---------|----------|----------|--------|---------|----------|
| Cotton                           | 3690.52                                     | 2805.66  | 3690.52  | -        | -       | 2980.41  | -        | -      | -       | 3690.52  |
| Sugarcane                        | 929.57                                      | 929.57   | 929.57   | -        | -       | 919.98   | -        | -      | -       | 930.00   |
| Tobacco                          | 2684.29                                     | 2684.29  | 2684.29  | 2684.29  | -       | 2556.56  | -        | -      | -       | 2684.29  |
| <b>5</b>                         | <b>PLANTATION &amp; HORTICULTURAL CROPS</b> |          |          |          |         |          |          |        |         |          |
| Lemon                            | 3016.56                                     | 3016.56  | 3016.56  | -        | 3016.56 | 2883.71  | -        | -      | -       | 3016.56  |
| Onion                            | 869.96                                      | 922.69   | 922.69   | -        | 890.30  | 927.60   | -        | -      | 890.00  | 870.00   |
| Tomato                           | 677.08                                      | 613.56   | 939.20   | 561.42   | 561.42  | 544.90   | -        | -      | 561.00  | 677.00   |
| Banana                           | 1690.69                                     | 1690.69  | 1690.69  | 1690.69  | 1690.69 | 1510.27  | 1646.28  | -      | -       | 1690.69  |
| Beans                            | 1390.81                                     | 1391.21  | 1309.42  | 1309.67  | 1309.67 | 1533.91  | -        | -      | 1310.00 | 1391.00  |
| Brinjal                          | 740.28                                      | 748.49   | 747.26   | 748.49   | 748.49  | 637.83   | -        | -      | 748.00  | 740.00   |
| Cabbage                          | 405.93                                      | 405.93   | 405.93   | 405.93   | 407.94  | 374.99   | -        | -      | -       | 406.00   |
| Cashewnut (Raw & Processed Nuts) | 4667.80                                     | 4667.80  | 4667.80  | 4667.80  | 4348.33 | 4098.33  | 4098.33  | -      | -       | 4667.80  |
| Coconut                          | 4466.02                                     | 4466.02  | 4466.02  | 4466.02  | 4466.02 | 4351.66  | 4351.66  | -      | -       | 4466.02  |
| Grapes                           | 1738.93                                     | 1738.93  | 1738.93  | -        | -       | 1619.04  | -        | -      | -       | 1738.93  |
| Guava                            | 584.71                                      | 584.71   | 584.71   | 584.71   | 584.71  | 552.13   | -        | -      | -       | 584.71   |
| Mango                            | 670.58                                      | 670.58   | 670.58   | 670.58   | 670.58  | 633.50   | -        | 671.00 | -       | 670.58   |
| Papaya                           | 726.04                                      | 726.04   | 726.04   | 726.04   | 726.04  | 714.00   | -        | -      | -       | 726.04   |
| Pomogranate                      | 7443.38                                     | 7443.38  | 7443.38  |          | 7443.38 | 7224.00  | -        | -      | -       | 7443.38  |
| Potato                           | 883.49                                      | 639.43   | 799.11   | 800.00   | 800.00  | 954.64   | -        | -      | -       | 883.49   |
| Sapota                           | 1493.10                                     | 1493.10  | 1493.10  | 1493.10  | 1493.00 | 1408.63  | -        | -      | -       | 1493.10  |
| Sweet potato                     | 450.96                                      | 568.27   | 568.27   | 568.27   | 275.00  | 551.63   | -        | -      | -       | 450.96   |
| Tapioca                          | 806.59                                      | 806.59   | -        | 806.59   | -       | 776.76   | 721.29   | -      | -       | 806.59   |
| Coffee (Arabica)                 | 11997.13                                    | -        | 14250.18 | 14304.36 | -       | -        | 14304.36 | -      | -       | -        |
| Coffee (Robusta)                 | 8208.75                                     | -        | 9981.82  | 6772.36  | -       | -        | 6772.36  | -      | -       | -        |
| <b>6</b>                         | <b>CONDIMENTS &amp; SPICES CROPS</b>        |          |          |          |         |          |          |        |         |          |
| Coriandar                        | 4558.09                                     | 4558.09  | 4558.09  | -        | 4558.09 | 4350.82  | -        | -      | -       | 4558.09  |
| Arecanut (Raw & Processed Nuts)  | 13331.14                                    | 9343.66  | 9343.66  | 9343.66  | 9343.66 | 13876.97 | 12942.44 | -      | -       | 13331.14 |
| Black Pepper                     | 21845.87                                    | 20784.95 | 20784.95 | 19541.56 | -       | 18152.31 | 23283.95 | -      | -       | 21845.87 |

## Supplementary materials

|              |          |          |          |          |         |          |          |   |   |          |
|--------------|----------|----------|----------|----------|---------|----------|----------|---|---|----------|
| Cardamom     | 73691.80 | 73691.80 | 73691.80 | 73691.80 | -       | 73547.61 | 73547.61 | - | - | 73691.80 |
| Dry Chillies | 4388.39  | 4338.89  | 4338.89  | 4338.89  | 5394.66 | 4937.84  |          | - | - | 4388.39  |
| Dry Ginger   | 3525.27  | 1668.86  | 3525.27  | 3525.27  | 3525.27 | 3275.26  | 7293.97  | - | - | 3525.27  |
| Garlic       | -        | 3310.75  | 3310.75  | -        | -       | 3145.66  | -        | - | - | 4459.60  |
| Turmeric     | 4459.60  | 4765.48  | 4459.60  | 4459.60  | 4459.60 | 3802.76  | 3802.76  | - | - | -        |

Source: Extracted and compiled from <https://agmarknet.gov.in/>.

## References

Allen, R.G., Pereira, L.S., Raes, D., and Smith, M. (1998). Crop evapotranspiration-Guidelines for computing crop water requirements-FAO Irrigation and drainage paper 56. *FAO, Rome, 300* (9), p.D05109.

Deb, K., Agrawal, S., Pratap, A., Meyarivan, T. (2000). A Fast Elitist Non-dominated Sorting Genetic Algorithm for Multi-objective Optimization: NSGA-II. In: Schoenauer, M., et al. Parallel Problem Solving from Nature PPSN VI. PPSN 2000. Lecture Notes in Computer Science, vol 1917. Springer, Berlin, Heidelberg. [https://doi.org/10.1007/3-540-45356-3\\_83](https://doi.org/10.1007/3-540-45356-3_83)

Ekka, A., Keshav, S., Pande, S., van der Zaag, P., & Jiang, Y. (2022). Dam-induced hydrological alterations in the upper Cauvery River basin, India. *Journal of Hydrology: Regional Studies*, 44, 101231.

Gutierrez, J. C. T., Adamatti, D. S., & Bravo, J. M. (2019). A new stopping criterion for multi-objective evolutionary algorithms: application in the calibration of a hydrologic model. *Computational Geosciences*, 23, 1219-1235.

Mohan, S., & Arumugam, N. (1994). Crop coefficients of major crops in South India. *Agricultural Water Management*, 26(1-2), 67-80.

## Supplementary materials

The Nature Conservancy (2009). Indicators of Hydrologic Alteration (IHA) Software Version 7.1 User's Manual. *The Nature Conservancy: Charlottesville, VA, USA*.

Wang, Q., Wang, L., Huang, W., Wang, Z., Liu, S., & Savić, DA., 2019. Parameterization of NSGA-II for the optimal design of water distribution systems. *Water*, 11 (5), 971. <https://doi.org/10.3390/w11050971>
